# Supplementary material
Source: PubMed Central journal article supplement (PMC7364384)

## Appendix A. Supplementary data

Supplementary Fig. 1 Degradation of Cdc25A *in vivo* following etoposide-induced DNA damage. (A) Etoposide-induced degradation of endogenous Cdc25A and its recovery after MG 132 incubation. U2OS cells were treated with 40  $\mu$ M [etoposide](#) for 12 h, or incubated with etoposide for 12 h and then 10  $\mu$ M MG 132 was added for an additional 2 h or 4 h, respectively. The indicated proteins were analyzed by Western blotting. (B) Degradation of ectopic Cdc25A after etoposide treatment. HEK293 cells were transfected with increasing amount of flag-tagged Cdc25A, and were then cultured in the absence or presence of 40  $\mu$ M etoposide for 12 h. [Cell lysates](#) were harvested and analyzed for Cdc25A expression profiles by Western blotting,  [\$\beta\$ -actin](#) was immunoblotted to control for protein loading.

Supplementary Fig. 2 [Immunoprecipitation](#) of Cdc25A. HEK293 cells transfected with 50  $\mu$ g flag-tagged Cdc25A cDNA and were untreated or treated with 40  $\mu$ M etoposide for 12 h followed by incubation with 10  $\mu$ M MG 132 for an additional 4 h. Cell lysates were immunoprecipitated with mouse anti-Cdc25A antibody or normal mouse IgG. Immunoprecipitates were analyzed by SDS-PAGE and [Coomassie brilliant blue](#) staining.

Supplementary Fig. 3 [Phosphorylation](#) profiling of cdc25A by [trypsin](#) digestion. cdc25A from control cells and from cells subjected to DNA damage were digested with trypsin and the resulting peptides were profiled by MALDI-TOF MS as described in the experimental section. Panels A (control cdc25A) and [B \(DNA damaged cdc25A\)](#) represent the low mass region of the MALDI spectra for each sample corresponding to the expected mass for the tryptic peptide containing S519 (EMYSR). The peptide mass detected at  $m/z = 685.31$  was subjected to MALDI-TOF/TOF fragmentation to confirm the sequence as EMYSR (Panel C). The inset shows the sequence coverage for the b and y [ions](#). The blue + 80 Da arrow in panel A represents the expected mass shift for the phosphorylated form of EMYSR containing S519.

Supplementary Fig. 4 Phosphorylation profiling of cdc25A by [chymotrypsin](#) digestion. Cdc25A from control cells and from cells subjected to DNA damage were digested with chymotrypsin and the resulting peptides were profiled by MALDI-TOF MS as described in the experimental section. Panels A (control cdc25A) and B (DNA damaged cdc25A) represent the mid-mass region of the MALDI spectra for each sample corresponding to the expected mass for the chymotryptic peptide containing S513 (AGEKSKREMY). The peptide mass detected at  $m/z = 1198.5$  (boxed in blue) was subjected to MALDI-TOF/TOF fragmentation to confirm the sequence as AGEKSKREMY (Panel C). The inset shows the sequence coverage for the b and y ions. The

blue + 80 Da arrow in panel A represents the expected mass shift for the phosphorylated form of AGEKSKREMY containing S513. The peptide and + 80 Da arrow highlighted in red (Panel A) represent a potential peptide/phosphopeptide pair for a predicted chymotryptic peptide containing [serine](#) 178. The 87 Da mass difference between y6 and y7 in panel D is highlighted as unphosphorylated S178, while the mass shift between y6 and y7 in panel E is consistent with S178 (87 Da) plus an additional 80 Da due to the phosphorylation as indicated. MALDI-TOF/TOF fragmentation of  $m/z = 1388.62$  and  $1468.59$  are provided in Panel D and E, respectively. The insets show the sequence coverage for the b and y ions

## Supplementary figure 1

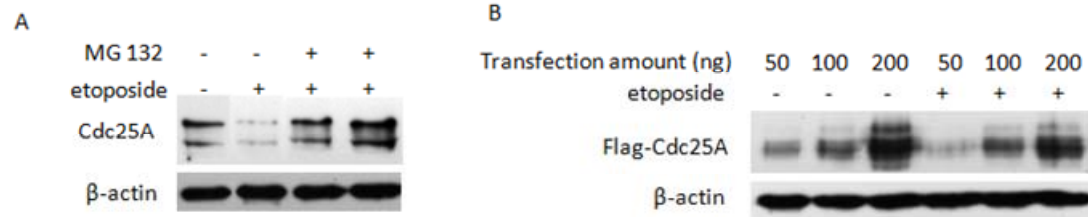

## Supplementary figure 2

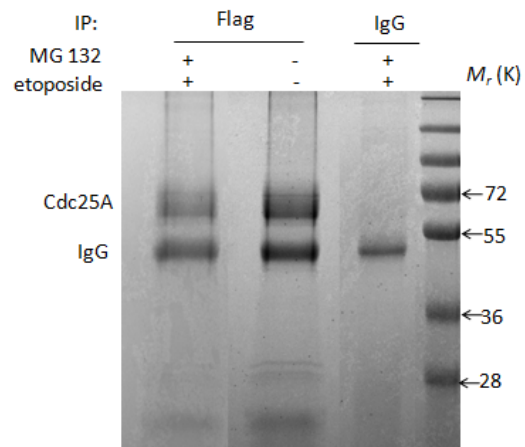

Supplementary figure 3

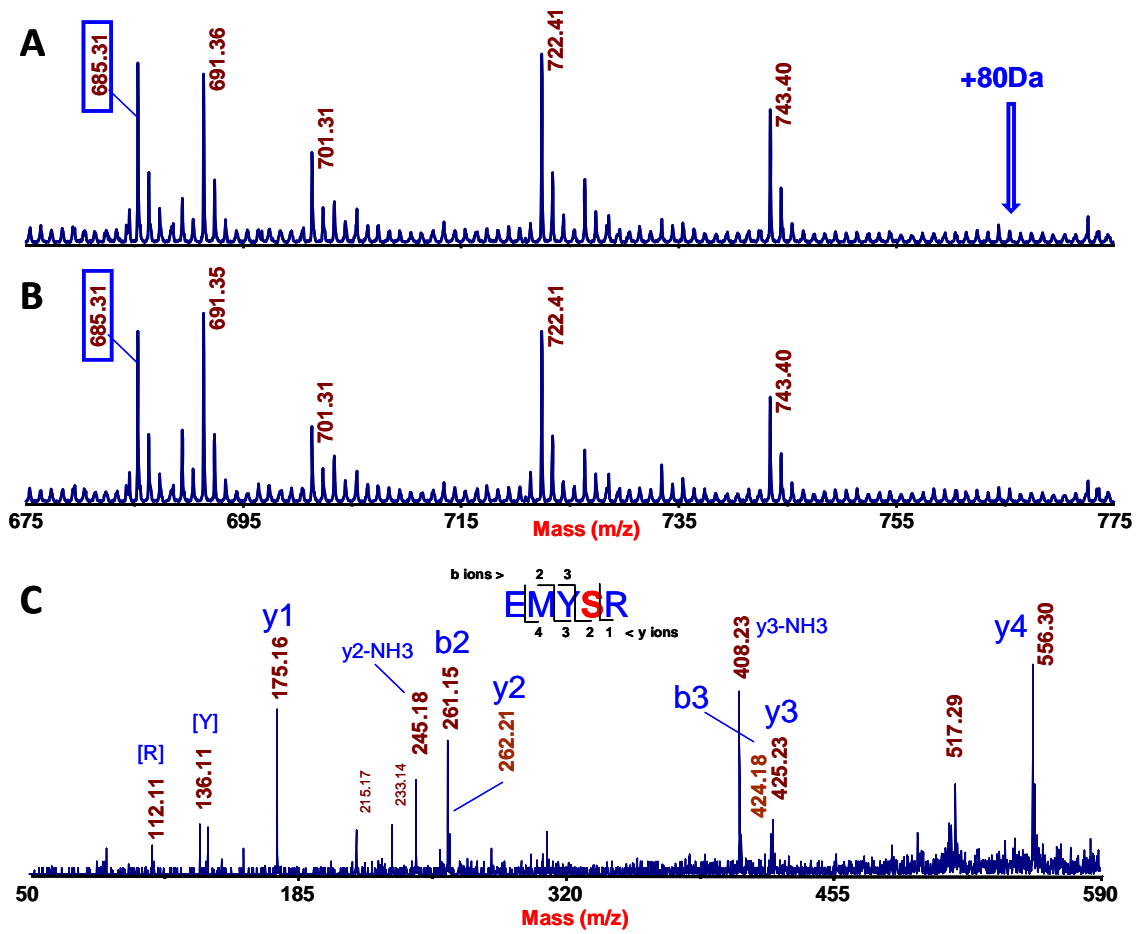

Supplementary figure 4

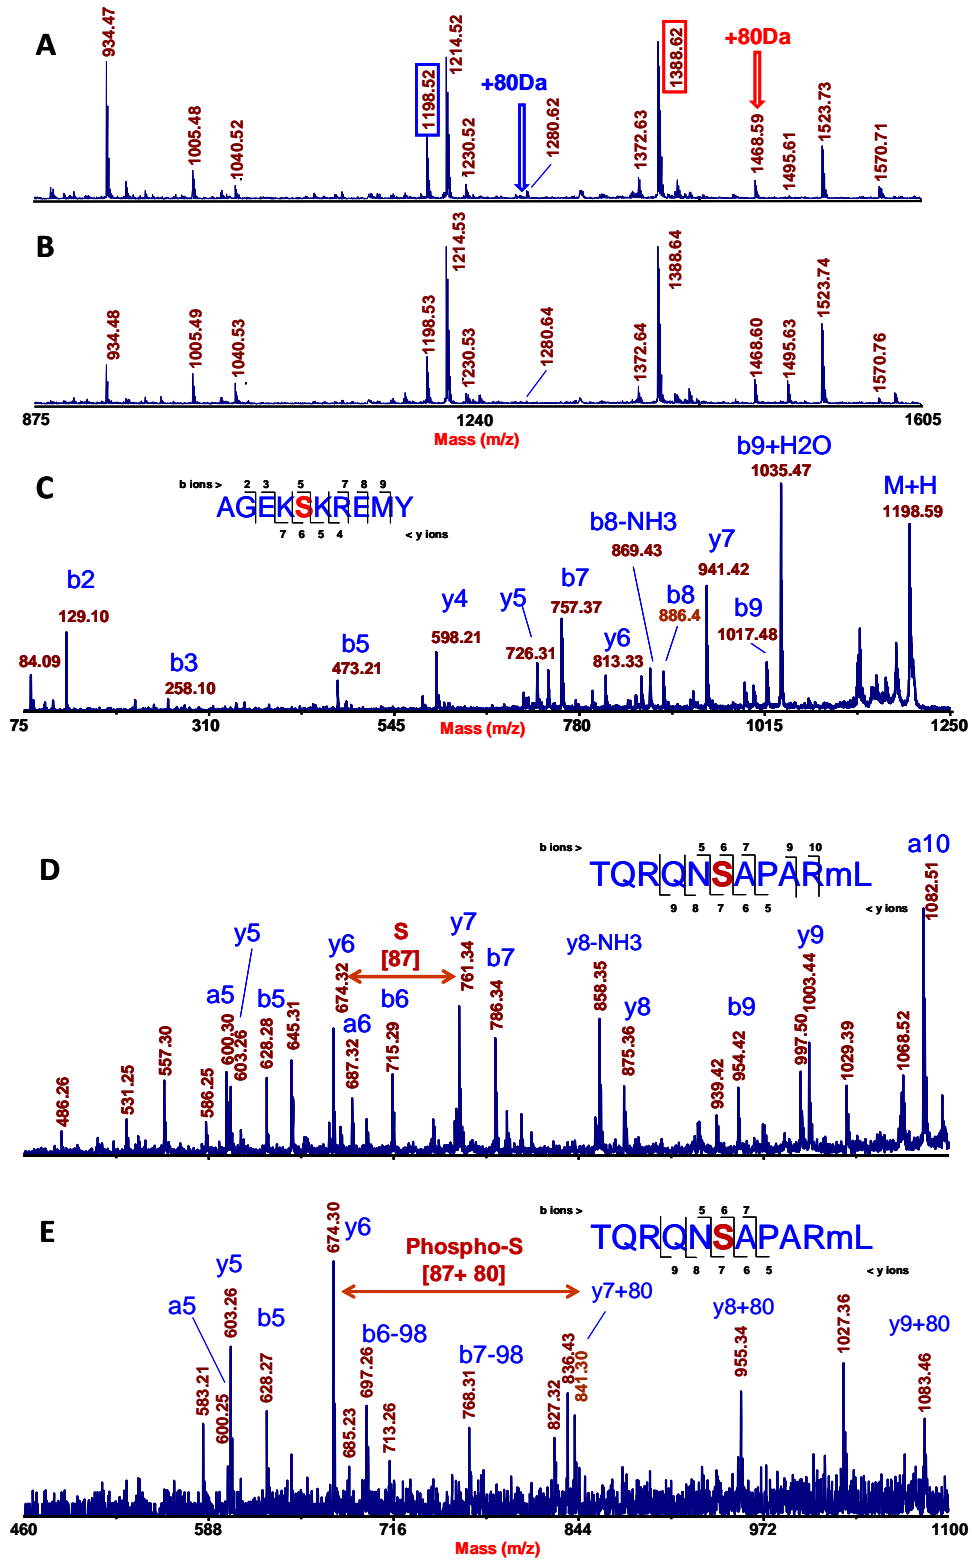

Supplement: NIHMS1592064-supplement-Appendix_A.pdf [file NIHMS1592064-supplement-Appendix_A.pdf]
