# Supplementary material
Source: PubMed Central journal article supplement (PMC7364384)

## Supplementary figure 1

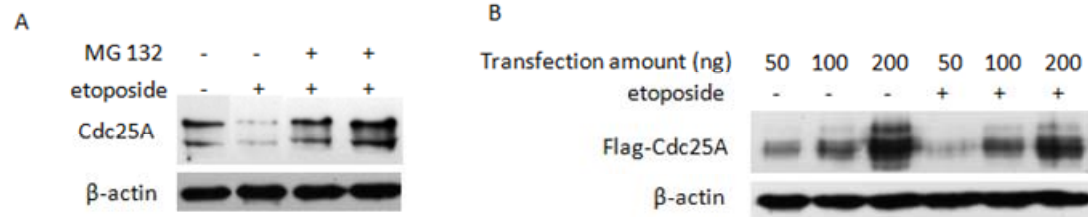

## Supplementary figure 2

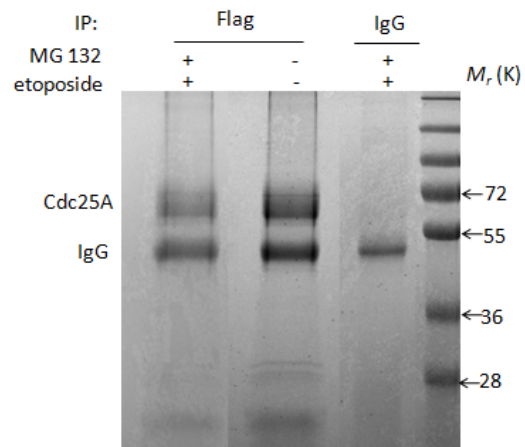

Supplementary figure 3

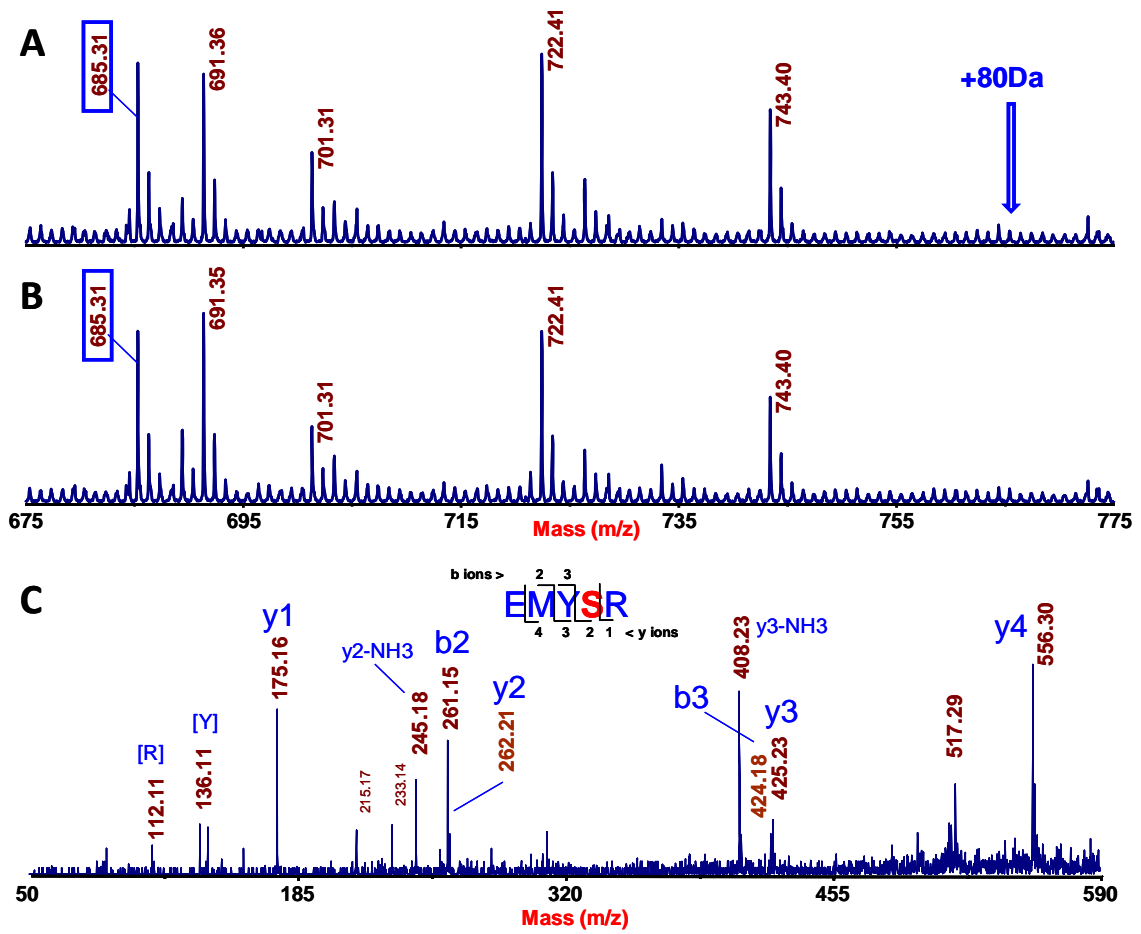

Supplementary figure 4

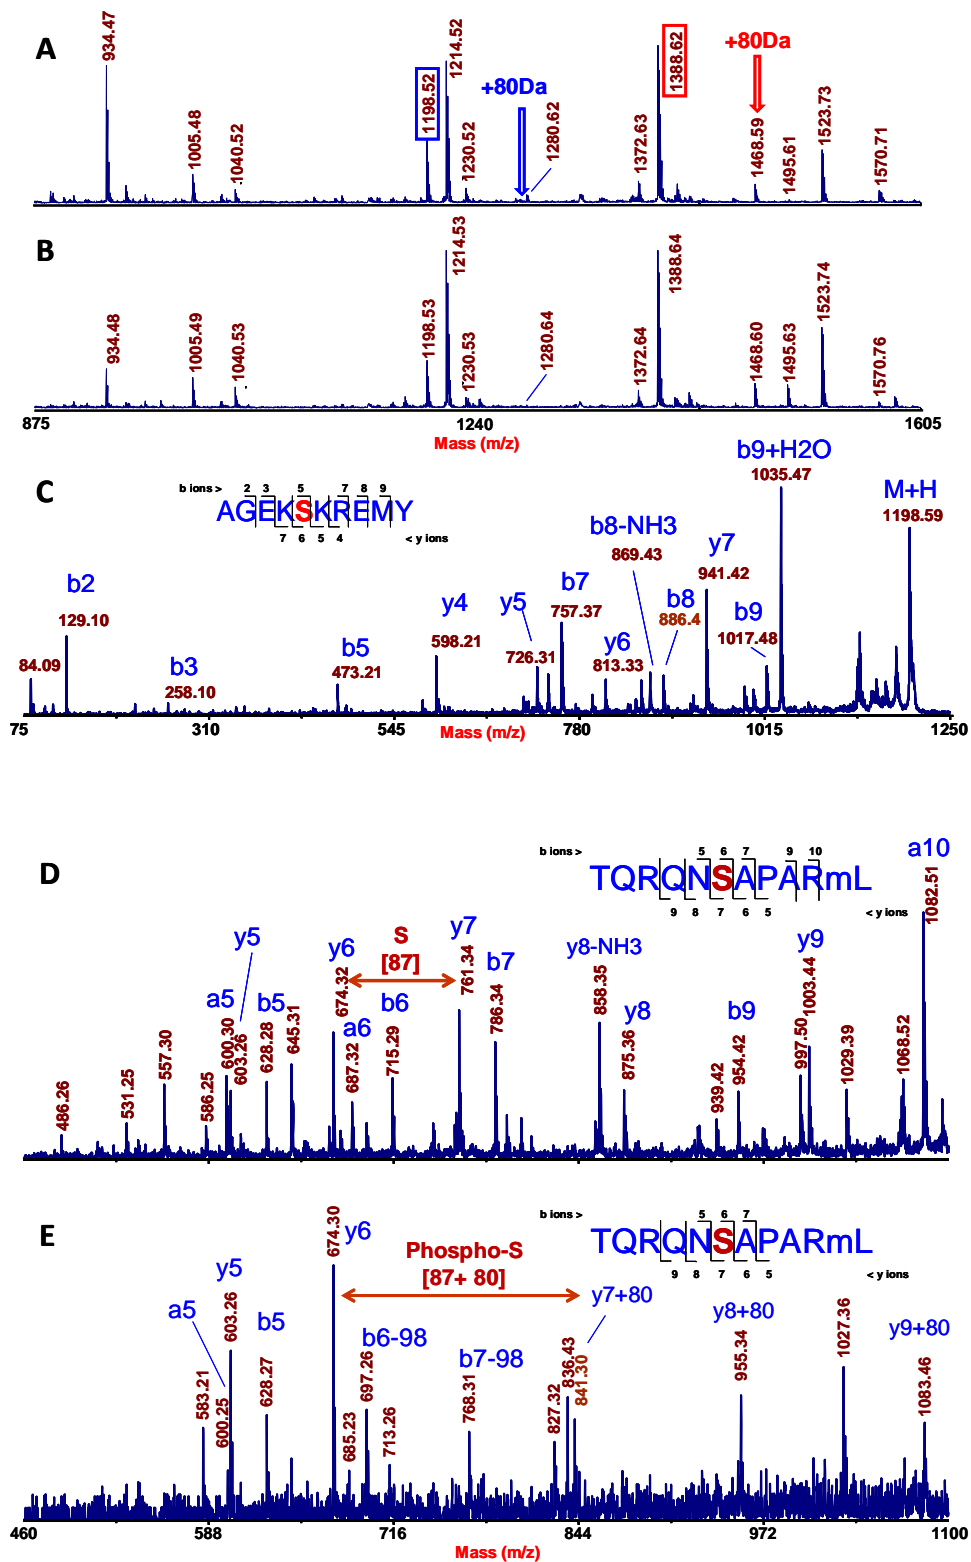

Supplement: NIHMS1592064-supplement-Supplementary_figures.pdf [file NIHMS1592064-supplement-Supplementary_figures.pdf]
